# Supplementary material for: Drug repositioning of herbal compounds via a machine-learning approach
Source: Springer Nature journal article supplement (doi:10.1186/s12859-019-2811-8), 2019-05-01
Supplement: 12859_2019_2811_MOESM2_ESM.pdf [file 12859_2019_2811_MOESM2_ESM.pdf]

**Table S1 – Performance of prediction models in cross-validation**

|              | <b>Logistic regression</b> | <b>Random forest</b>  | <b>SVM (Linear)</b>  | <b>SVM (Quadratic)</b> | <b>SVM (Cubic)</b>    | <b>SVM (RBF)</b>      |
|--------------|----------------------------|-----------------------|----------------------|------------------------|-----------------------|-----------------------|
| Accuracy (%) | 86.8797<br>(± 0.0009)      | 90.5865<br>(± 0.0009) | 87.253<br>(± 0.0012) | 87.8546<br>(± 0.0013)  | 87.4962<br>(± 0.0016) | 88.5188<br>(± 0.0012) |
| AUC          | 0.9131<br>(± 0.006)        | 0.9482<br>(± 0.0006)  | 0.9151<br>(± 0.0007) | 0.9222<br>(± 0.0005)   | 0.9213<br>(± 0.0011)  | 0.9267<br>(± 0.0012)  |
| AUPR         | 0.8616<br>(± 0.0022)       | 0.9256<br>(± 0.0008)  | 0.8678<br>(± 0.0023) | 0.8752<br>(± 0.0017)   | 0.8775<br>(± 0.0031)  | 0.8874<br>(± 0.0020)  |
| Sensitivity  | 0.7580<br>(± 0.0016)       | 0.8257<br>(± 0.0017)  | 0.7672<br>(± 0.0017) | 0.7703<br>(± 0.0040)   | 0.7551<br>(± 0.0040)  | 0.7865<br>(± 0.0027)  |
| Specificity  | 0.9242<br>(± 0.0008)       | 0.9459<br>(± 0.0009)  | 0.9252<br>(± 0.0012) | 0.9327<br>(± 0.0018)   | 0.9349<br>(± 0.0013)  | 0.9345<br>(± 0.0014)  |
| Precision    | 0.8342<br>(± 0.0016)       | 0.8846<br>(± 0.0018)  | 0.8378<br>(± 0.0024) | 0.8520<br>(± 0.0031)   | 0.8538<br>(± 0.0028)  | 0.8581<br>(± 0.0026)  |

**Table S2 – Performance of prediction models in external validation**

|              | <b>Logistic regression</b> | <b>Random forest</b>  | <b>SVM (Linear)</b>   | <b>SVM (Quadratic)</b> | <b>SVM (Cubic)</b>    | <b>SVM (RBF)</b>      |
|--------------|----------------------------|-----------------------|-----------------------|------------------------|-----------------------|-----------------------|
| Accuracy (%) | 90.8962<br>(± 0.0005)      | 93.2541<br>(± 0.0005) | 90.5030<br>(± 0.0005) | 92.2676<br>(± 0.0006)  | 92.5163<br>(± 0.0006) | 91.9730<br>(± 0.0008) |
| AUC          | 0.8255<br>(± 0.0003)       | 0.8285<br>(± 0.0013)  | 0.8268<br>(± 0.0003)  | 0.7986<br>(± 0.0033)   | 0.8114<br>(± 0.0021)  | 0.8162<br>(± 0.0021)  |
| AUPR         | 0.2553<br>(± 0.0006)       | 0.2924<br>(± 0.0033)  | 0.2525<br>(± 0.0007)  | 0.2922<br>(± 0.0024)   | 0.3112<br>(± 0.0023)  | 0.3110<br>(± 0.0033)  |
| Sensitivity  | 0.5843<br>(± 0.0022)       | 0.5004<br>(± 0.0069)  | 0.6034<br>(± 0.0049)  | 0.5176<br>(± 0.0027)   | 0.5075<br>(± 0.0028)  | 0.5191<br>(± 0.0030)  |
| Specificity  | 0.9215<br>(± 0.0005)       | 0.9492<br>(± 0.0006)  | 0.9167<br>(± 0.0007)  | 0.9383<br>(± 0.0007)   | 0.9413<br>(± 0.0007)  | 0.9352<br>(± 0.0009)  |
| Precision    | 0.2229<br>(± 0.0009)       | 0.2751<br>(± 0.0025)  | 0.2181<br>(± 0.0009)  | 0.2446<br>(± 0.0018)   | 0.2502<br>(± 0.0019)  | 0.2364<br>(± 0.0023)  |
